# Supplementary material
Source: publisher figshare collection journal article supplement (https://acs.figshare.com/ndownloader/files/3740905)
Supplement: Supplementary file 1 [file 3740905]

# Supporting Information

## Photonic Sintering of Copper through the Controlled Reduction of Printed CuO Nanocrystals

*Francesco Paglia,<sup>†,‡</sup> Doojin Vak,<sup>†</sup> Joel van Embden,<sup>#</sup> Anthony S. R. Chesman,<sup>†</sup> Alessandro Martucci,<sup>‡</sup> Jacek J. Jasieniak<sup>\*,§</sup>, Enrico Della Gaspera<sup>\*,†</sup>*

<sup>†</sup> CSIRO Manufacturing Flagship, Bayview Avenue, Clayton, Victoria 3168, Australia

<sup>‡</sup> Dipartimento di Ingegneria Industriale Via Marzolo 9, Universita' di Padova - 35131  
PADOVA, Italy

<sup>#</sup> School of Applied Science, RMIT University, Melbourne, Victoria 3000, Australia

<sup>§</sup> Department of Materials Science and Engineering, Monash University, Clayton, Victoria, 3800,  
Australia

Corresponding authors: \*enrico.dellagaspera@csiro.au; jacek.jasieniak@monash.edu

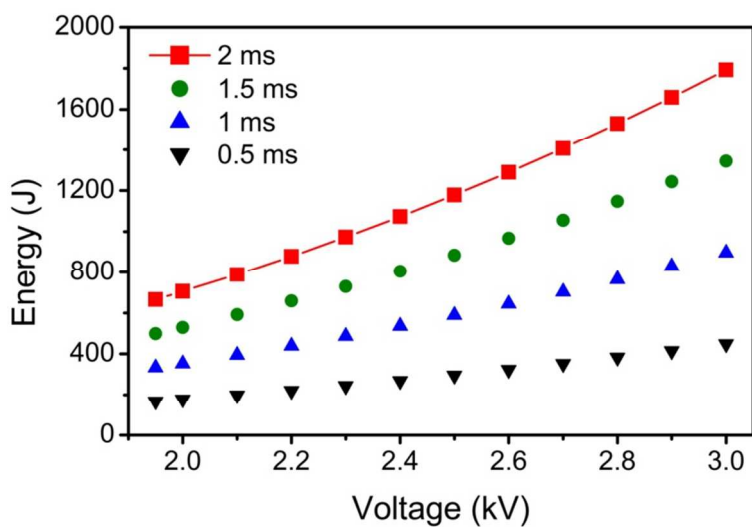

**Figure S1.** Energy delivered on the sample as a function of the applied voltage for different light pulse durations. The red line highlights the conditions adopted in this study.

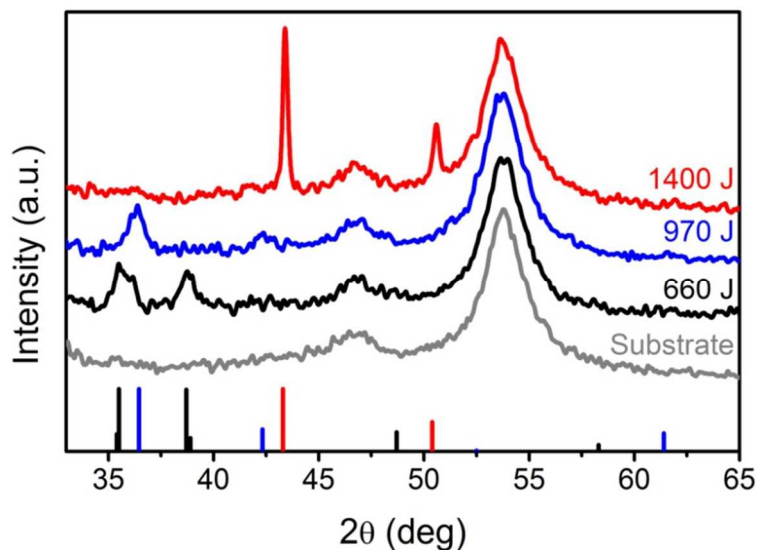

**Figure S2.** XRD patterns for CuO films subjected to IPL exposure of different energies deposited on Novele™ substrate. The diffraction pattern for the substrate is reported as well. The predicted peaks position for CuO (ICDD No. 48-1548, black), Cu<sub>2</sub>O (ICDD No. 05-0667, blue) and Cu (ICDD No. 04-0836, red) are reported at the bottom.

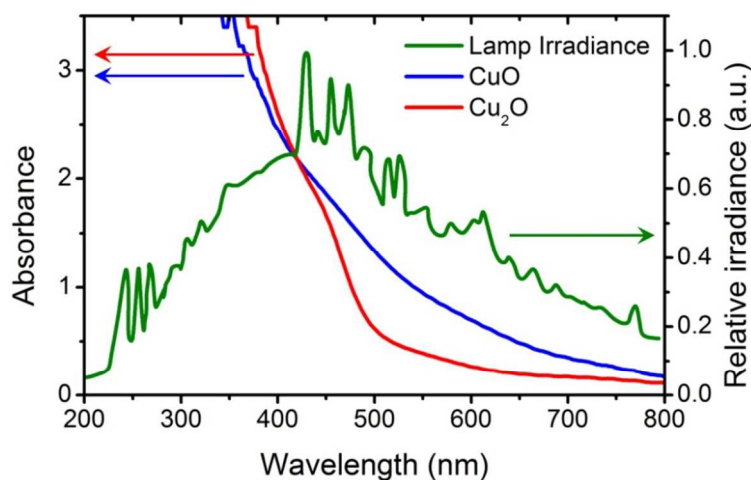

**Figure S3.** Emission spectrum of the xenon flash lamp and comparison with the absorption spectrum of CuO and Cu<sub>2</sub>O films.

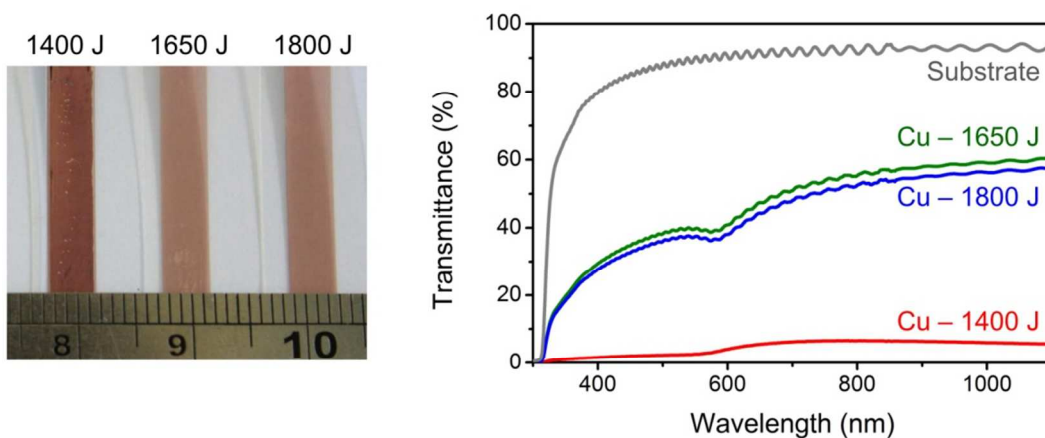

**Figure S4.** Digital picture (left) and transmission spectra (right) of Cu films properly sintered (pulse energy = 1400 J) and of Cu films exposed to excessive light energy (1650-1800 J). The overexposed samples are not conductive and show a higher transmission due to the loss of copper through vaporization and delamination. The small circular marks on the sample on the left are due to the tips of the 4-point probe used for the electrical measurements.

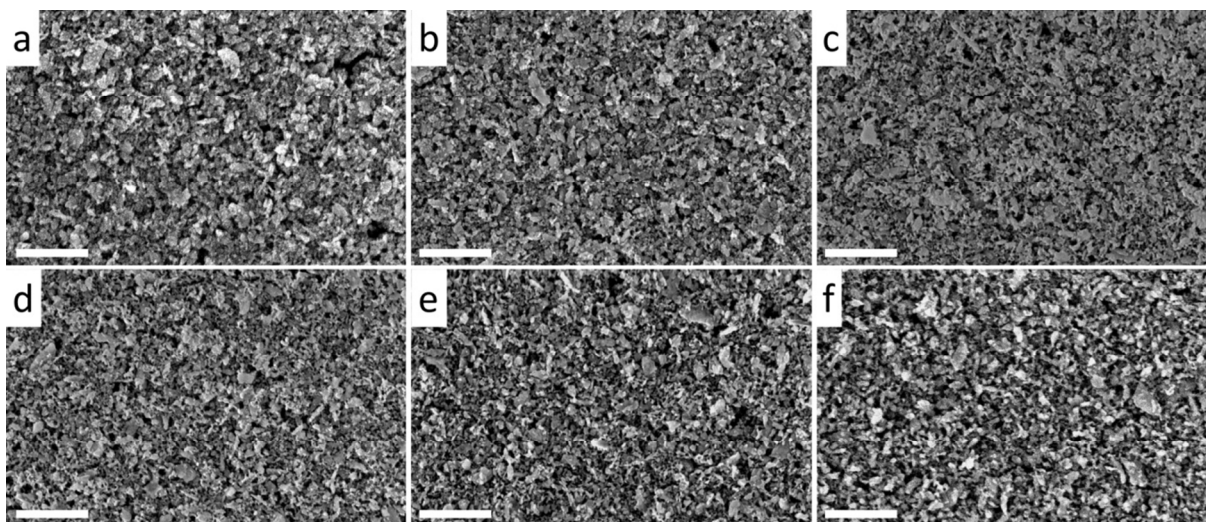

**Figure S5.** SEM characterization of the CuO coatings exposed to different energies of IPL: as deposited (a); 790 J (b); 880 J (c); 970 J (d); 1070 J (e); 1180 J (f). All scale bars are 500 nm.

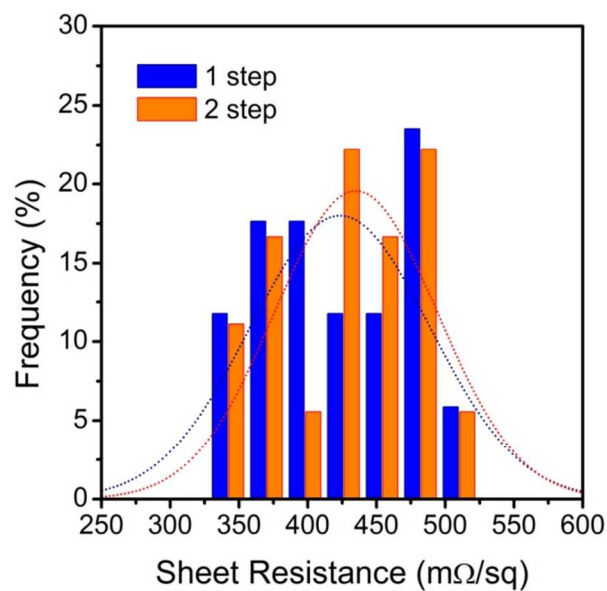

**Figure S6.** Distribution of sheet resistance values for samples sintered using one single light pulse at 1400 J (1 step) or 2 light pulses (970 J + 1400 J, 2 step). The dashed lines are the Gaussian fit of the histograms. No significant differences in resistivity can be seen using the two different IPL exposure protocols.

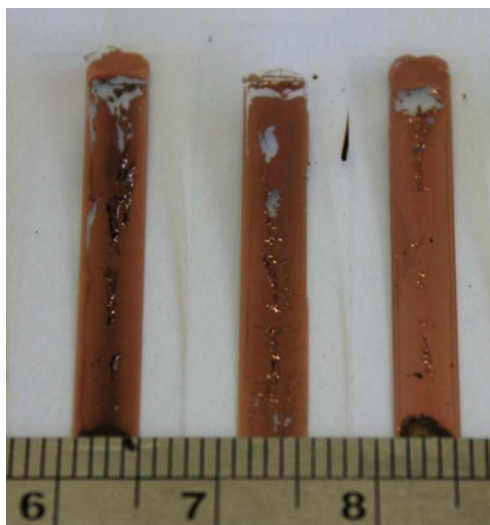

**Figure S7.** Digital picture of thick films exposed to one single high energy pulse showing massive delamination and blow-off problems. Incomplete reduction of copper oxide to copper metal can be also noticed from the dark color emerging from underneath the sintered layer.

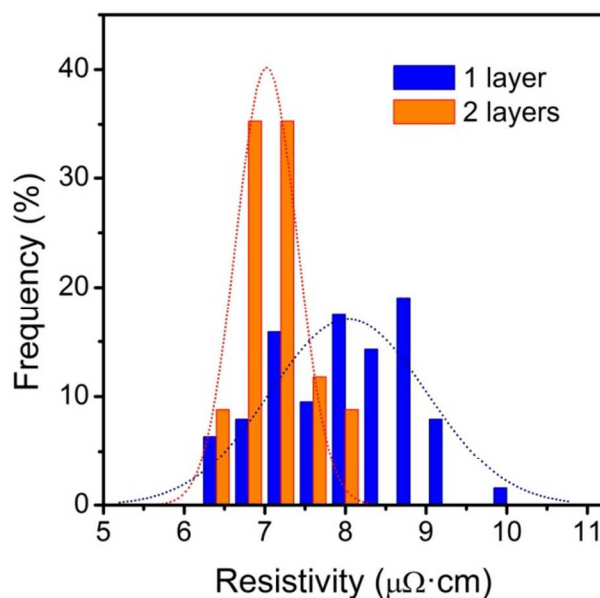

**Figure S8.** Distribution of resistivity values for samples prepared from 1 layer or from 2 layers of CuO NCs. The dashed lines are the Gaussian fit of the histograms.

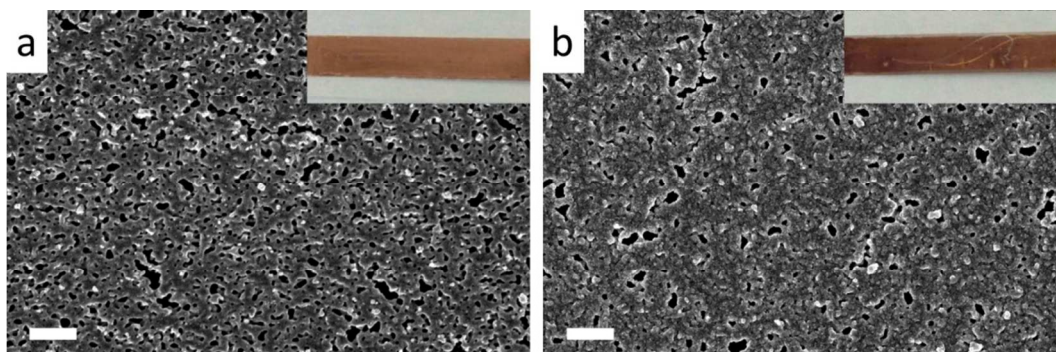

**Figure S9.** SEM images of Cu samples right after IPL exposure (a) and after prolonged exposure to ambient air (b). The scale bar is 1  $\mu\text{m}$  in both panels. The insets show digital pictures of the samples. The re-oxidation of Cu in air causes a darkening of the films and the formation of a rougher and more faceted surface, as can be seen in (b).

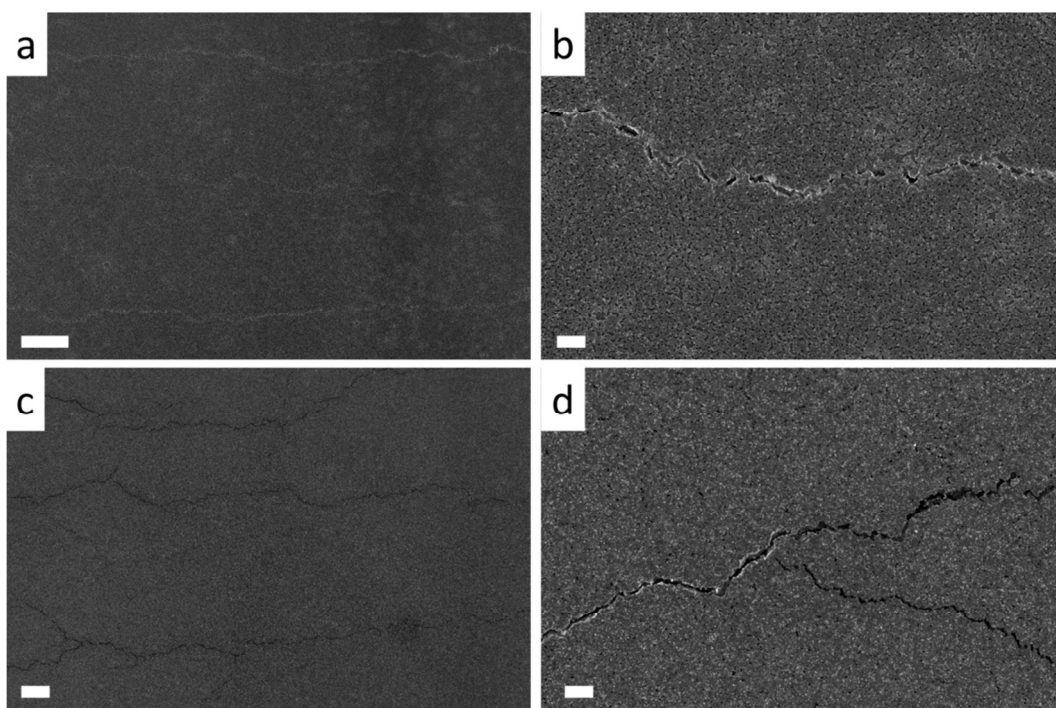

**Figure S10.** SEM images of Cu samples after 100 bending cycles showing the crack formation. (a,b) 1 layer, with linear parallel cracks; (c,d) 2 layers, with branched cracks. The scale bars are 20  $\mu\text{m}$  in (a,c) and 2  $\mu\text{m}$  in (b, d).

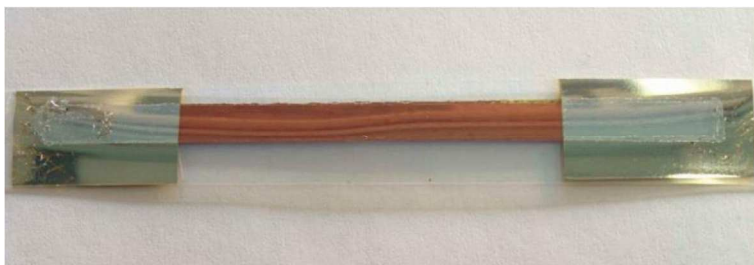

**Figure S11.** Picture of a sintered Cu strip with evaporated Ag contact pads used for long-term stability measurements and bending tests.
